# Supplementary material for: Assessment of microbiota diversity in dental unit waterline contamination
Source: PeerJ. 2022 Jan 6;10:e12723. doi: 10.7717/peerj.12723 (PMC8743008; doi:10.7717/peerj.12723)
Supplement: Supplemental Information 2 [file peerj-10-12723-s002.xls]

## Sheet: Sheet 1
1=PE,2=EN,3=PR		1=Mouth-rinse water, 2=Air-water syringe, 3=Handpiece
Department	Dental unit number	Water outlets	Bacterial concentration-Morning	Bacterial concentration-Afernoon
1	1	1	220	50
1	2	1	9300	2700
1	3	1	680	320
1	4	1	230	140
1	5	1	30	30
1	6	1	220	130
1	7	1	100	350
1	8	1	1400	800
1	9	1	910	220
1	10	1	400	20
1	11	1	350	320
1	12	1	90	0
1	13	1	160	56
1	14	1	2160	700
1	15	1	1220	160
1	16	1	2000	670
1	17	1	420	290
1	18	1	74	78
1	19	1	1000	93
2	1	1	440	22
2	2	1	3	1390
2	3	1	20	20
2	4	1	40	116
2	5	1	70	32
2	6	1	1300	1540
2	7	1	86	30
2	8	1	40	0
2	9	1	4000	340
2	10	1	8	10
2	11	1	7	200
2	12	1	1240	108
2	13	1	46	630
2	14	1	4	8
2	15	1	18	38
2	16	1	912	2440
2	17	1	8	40
2	18	1	18	2
2	19	1	3800	4
2	20	1	68	68
2	21	1	50	232
3	1	1	3400	5200
3	2	1	28000	1530
3	3	1	21	182
3	4	1	380	820
3	5	1	200	280
3	6	1	2560	36
3	7	1	260	200
3	8	1	2	12
3	9	1	276	374
3	10	1	700	540
3	11	1	1060	780
3	12	1	55	45
3	13	1	280	20
3	14	1	200	70
3	15	1	168	1540
3	16	1	20	340
3	17	1	850	670
3	18	1	100	660
3	19	1	170	288
3	20	1	20	58
1	5	2	1150	650
1	6	2	910	960
1	7	2	440	1080
1	8	2	100	10
1	9	2	60	60
1	10	2	300	100
1	11	2	280	290
1	13	2	130	480
1	14	2	280	1000
1	15	2	112	17
1	16	2	0	20
1	17	2	20	10
1	18	2	60	94
1	19	2	14000	9000
1	1	2	3600	43000
1	2	2	2090	690
1	3	2	480	500
1	4	2	2940	1380
1	5	2	2820	1200
2	6	2	194	3060
2	7	2	980	710
2	8	2	0	0
2	9	2	102	78
2	10	2	160	180
2	11	2	400	2500
2	12	2	1080	1760
2	13	2	140	160
2	14	2	880	94
2	15	2	40	2
2	16	2	440	161
2	17	2	480	320
2	18	2	10	20
2	19	2	4	2
2	20	2	40	1120
2	21	2	32	10
2	1	2	28	58
2	2	2	22	58
2	3	2	18	16
2	4	2	3800	8200
2	5	2	200	68
3	6	2	114	220
3	7	2	12	164
3	8	2	7	46
3	9	2	8	180
3	10	2	1200	240
3	11	2	10	6
3	12	2	2	22
3	13	2	44	14
3	14	2	18	46
3	15	2	2080	140
3	16	2	4	16000
3	17	2	35	8
3	18	2	62	104
3	19	2	960	10
3	20	2	10	36
3	1	2	8	10
3	2	2	3	1
3	3	2	4400	240
3	4	2	128	1
3	5	2	40	0
1	6	3	420	3000
1	7	3	420	36950
1	8	3	420	3816000
1	9	3	300	290
1	10	3	1210	290
1	11	3	271	290
1	12	3	0	10
1	13	3	420	226
1	14	3	1880	750
1	15	3	1700	6000
1	16	3	2060	220
1	17	3	420	290
1	18	3	580	211
1	19	3	1390	276
2	1	3	1920	940
2	2	3	17	1890
2	3	3	30	60
2	4	3	540	106
2	5	3	24	28
2	6	3	10	260
2	7	3	14	18
2	8	3	30	0
2	9	3	192	1040
2	10	3	100	124
2	11	3	170	17
2	12	3	200	202
2	13	3	460	116
2	14	3	60	20
2	15	3	20	18
2	16	3	74	66
2	17	3	198	80
2	18	3	2960	10400
2	19	3	76	80
2	20	3	298	80
2	21	3	740	104
3	1	3	400	900
3	2	3	20	270
3	3	3	14	15
3	4	3	15	74
3	5	3	142	180
3	6	3	1320	500
3	7	3	32	18
3	8	3	136	52
3	9	3	1720	1240
3	10	3	900	540
3	11	3	224	148
3	12	3	20	14
3	13	3	90	40
3	14	3	2240	760
3	15	3	1260	6800
3	16	3	14	164
3	17	3	1700	209
3	18	3	360	560
3	19	3	60	60
3	20	3	76	26
