# Supplementary material for: Assessment of microbiota diversity in dental unit waterline contamination
Source: PeerJ. 2022 Jan 6;10:e12723. doi: 10.7717/peerj.12723 (PMC8743008; doi:10.7717/peerj.12723)
Supplement: Supplemental Information 3 [file peerj-10-12723-s003.xlsx]

## Sheet: Sheet1
Table S2. The overall relative abundance (%) top bacteria at phylum, class, order, family and genus levels and that among three groups of DUWL dental water samles (reltive abundance ＞0.1%)
		PE-M	EN-M	PR-M	Overall
Phylum	Proteobacteria	94.4866	87.0889	88.0596	90.0425
	Bacteroidetes	1.95087	4.69111	1.44025	2.5766
	Acidobacteria	0.571358	2.42819	2.43535	1.77536
	Chloroflexi	0.323705	0.496562	1.9575	0.951179
	Firmicutes	0.104486	2.44765	0.487407	0.9288
	Verrucomicrobia	0.2332	1.12888	0.557333	0.611035
Class	Gammaproteobacteria	40.758	32.3927	48.6024	41.0662
	Alphaproteobacteria	24.2376	33.5379	20.4121	25.6228
	Betaproteobacteria	29.3749	20.0346	18.216	22.6893
	Deltaproteobacteria	1.42478	1.95406	1.43831	1.58523
	Caldilineae	0.325963	0.45887	1.95295	0.939284
	Actinobacteria	0.948848	0.384993	0.392599	0.586685
Order	Pseudomonadales	33.4431	31.2489	48.3108	38.0452
	Burkholderiales	24.6327	20.5464	20.4212	21.9444
	Sphingomonadales	12.3518	23.1811	7.86407	13.953
	Rhizobiales	9.25987	9.19506	9.64456	9.37658
	Xanthomonadales	6.63114	0.320708	0.520574	2.61846
	Rhodocyclales	5.22674	0.197536	0.350583	2.02657
Family	Pseudomonadaceae	34.0069	30.9396	27.4034	30.7741
	Comamonadaceae	20.8572	20.821	19.0813	20.2198
	Sphingomonadaceae	11.219	23.7142	7.60266	13.6177
	Moraxellaceae	0.149868	0.528188	20.7891	7.54559
	Brucellaceae	3.28928	1.25767	3.21226	2.66456
	Rhodocyclaceae	5.5665	0.204998	0.326989	2.14035
Genus	Pseudomonas	34.6103	31.0279	27.594	31.0803
	Curvibacter	5.53724	13.0395	14.5787	10.9349
	Sphingobium	5.89919	19.9166	4.72476	9.60747
	Acinetobacter	0.138578	0.562985	21.0457	7.6424
	Acidovorax	10.472	3.69913	3.29528	5.94703
	Hydrogenophaga	4.45092	3.66388	1.0086	3.0045
